# Supplementary material for: Phytochemical Composition and Antioxidant and Anti-Inflammatory Activities of Ligularia fischeri Turcz: A Comparison between Leaf and Root Extracts
Source: MDPI journal article supplement (doi:10.3390/plants11213005), 2022-11-07
Supplement: s1 [file s1]

# Phytochemical Composition and Antioxidant and Anti-Inflammatory Activities of *Ligularia fischeri* Turcz: A comparison between Leaf and Root Extracts

(A)

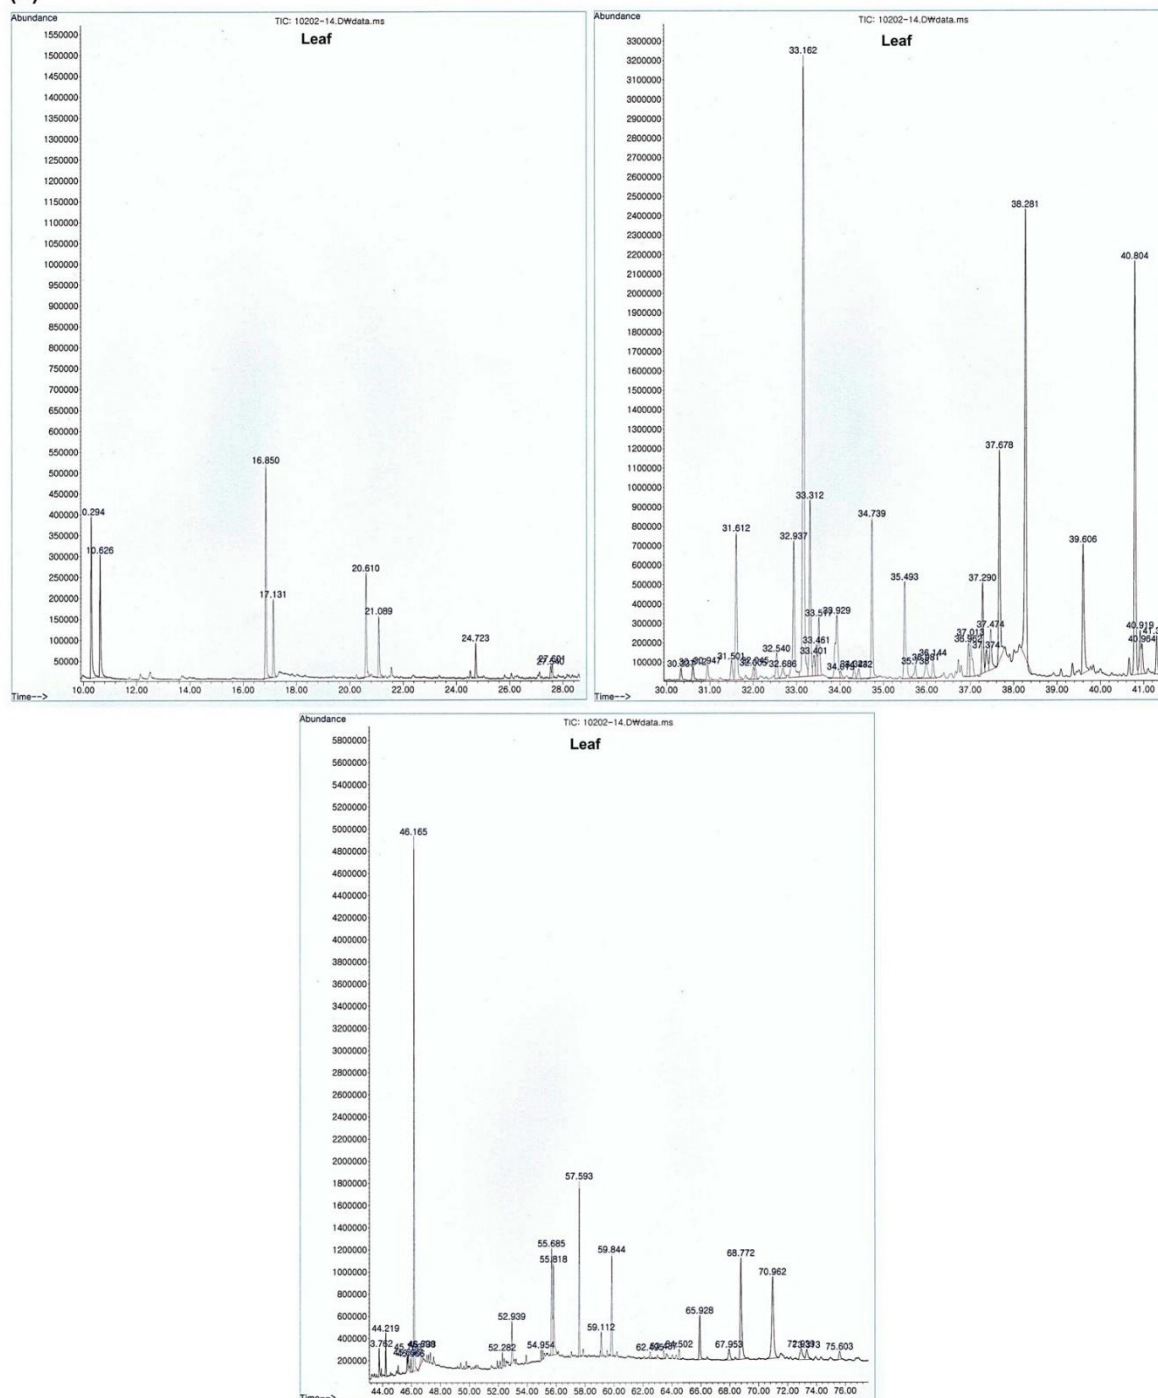

(B)

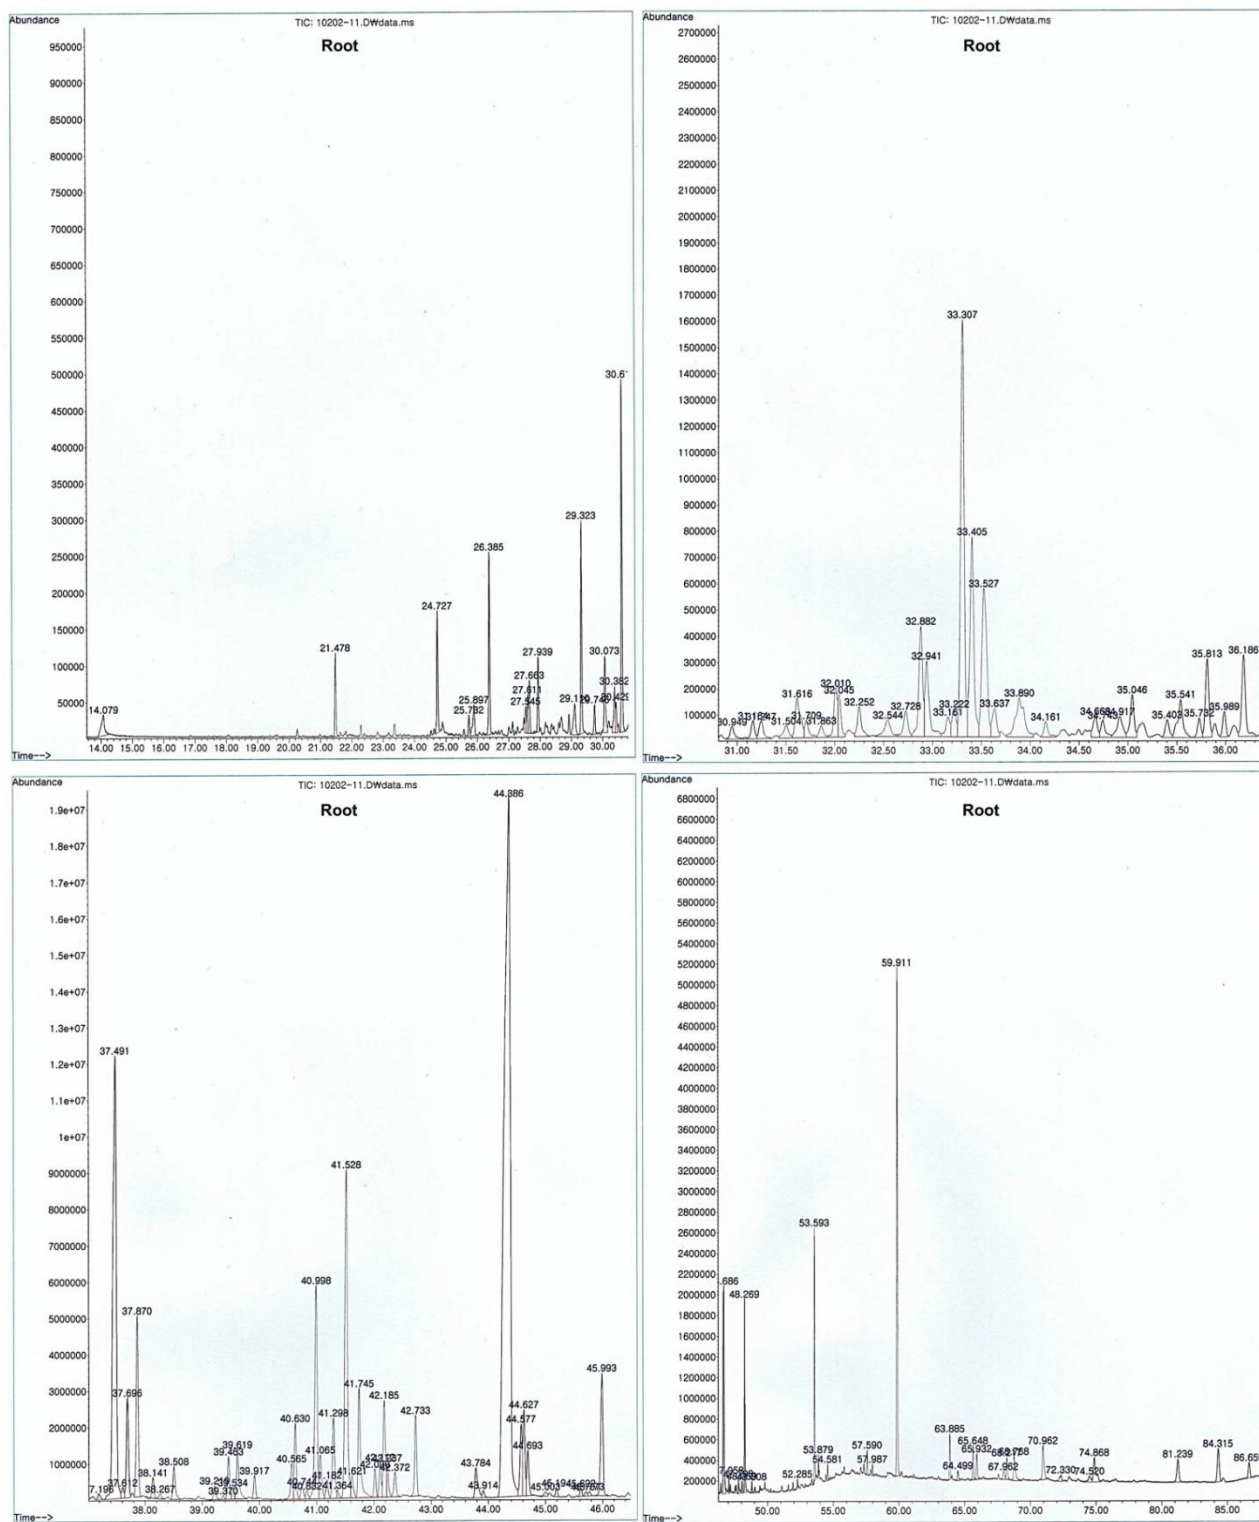

Figure S1. GC chromatograms of (A) leaf and (B) root extracts from *L. fischeri*.

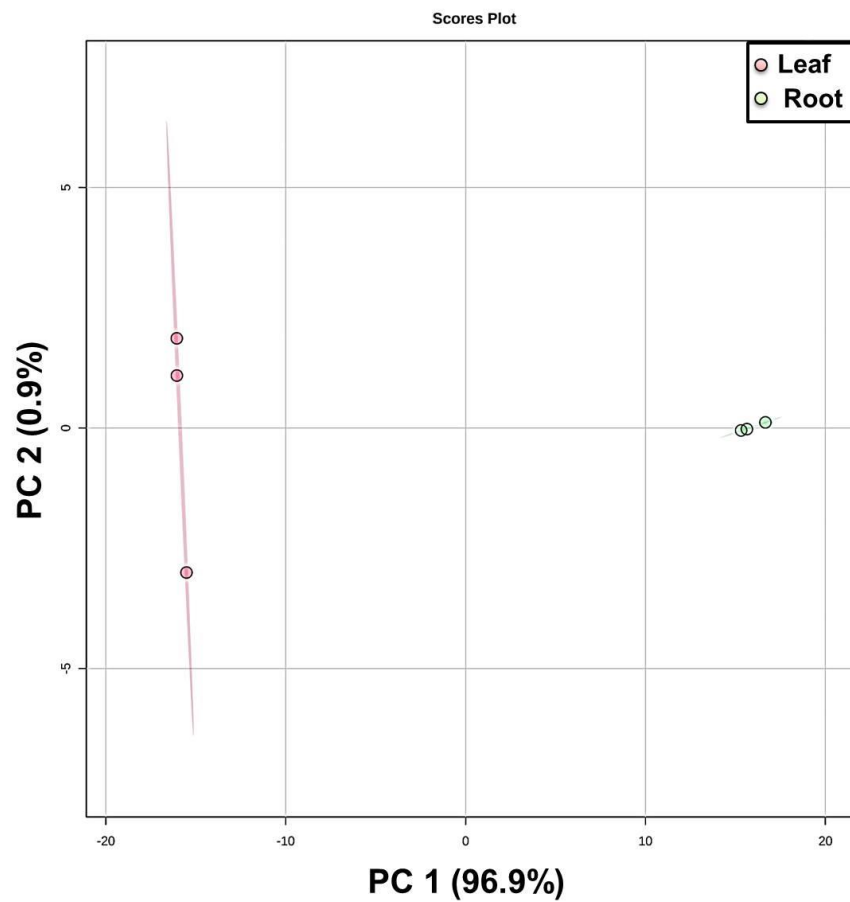

**Figure S2.** Principal component analysis (PCA) score plot of the non-polar compounds in roots and leaves of *L. fischeri*. Red dots represent non-polar compounds in leaves. Green dots represent non-polar compounds in roots.
